# 1 How researchers experience the impact of consortia and ERC 2 funding schemes on their science

3

4

5 Stephanie Meirmans<sup>1\*</sup> and Herman J. Paul<sup>2</sup>

6

7 *Affiliations:*

8 <sup>1</sup>Department of Ethics, Law and Humanities,

9 Amsterdam UMC,

10 Location Amsterdam Medical Center,

11 University of Amsterdam,

12 Meibergdreef 9,

13 1105 AZ Amsterdam,

14 The Netherlands

15 +31681302716

16 [s.meirmans@amsterdamumc.nl](mailto:s.meirmans@amsterdamumc.nl), [stephaniemeirmans@dds.nl](mailto:stephaniemeirmans@dds.nl)

17 <https://orcid.org/0000-0001-6509-1212>

18

19 <sup>2</sup>Institute for History,

20 Leiden University,

21 Doelensteeg 16

22 2311 VL Leiden,

23 The Netherlands

24 [h.j.paul@hum.leidenuniv.nl](mailto:h.j.paul@hum.leidenuniv.nl)

25 <https://orcid.org/0000-0002-9365-6329>

26

27

28 **Keywords:** research practice, grants, breakthrough, co-creation, interviews

29

30

31 **Abstract**

32 Policy makers push for consortia science geared towards addressing important issues.  
33 Such consortia are expected to target societal problems, be international, to engage in  
34 trans- or interdisciplinary research, to involve stakeholders and have specific plans for  
35 implementation. For example, Horizon Europe focuses on five missions that are being  
36 targeted by such type of consortia. This, however, does not seem to be the type of funding  
37 that active researchers appreciate the most: a recent letter signed by over 24.000  
38 researchers clearly shows their preference for ERC grants. What are the underlying  
39 reasons for this difference? Here, we share insights on how natural science and medical  
40 researchers experience the impact of these funding schemes using interviews. Our  
41 findings highlight that the two different types of funding schemes have a different  
42 performative effect on research, and that ERC-type funding aligns most with how  
43 scientists think research should best be conducted.

44

## 45 **Introduction**

46 Funding agencies spend considerable sums on fostering collaborative science (Wager  
47 2018). In consortia funding, scientists typically target a specific societal problem or  
48 challenge in bigger interdisciplinary and often also international groups, working closely  
49 together with stakeholders and citizens. An international frontrunner for such consortia  
50 funding efforts is for example the EU in its top-down pillars of the Horizon 2020  
51 framework (De Rijcke and Wilsdon 2019), but also national funders increasingly fund  
52 these types of consortia (for example the Dutch and Swiss national funders).

53         Against this trend in science policy, researchers themselves seem to value other,  
54 perhaps more traditional, types of funding schemes more highly. For example, in a recent  
55 ‘letter of the friends of the ERC’, over 24.000 researchers had signed a plea for not  
56 reducing funding towards the ERC (see Friends of the ERC, letter,  
57 <https://friendsoftheerc.w.uib.no/the-letter/>). What do such pleas mean for the current  
58 predominant trend away from more traditional types of funding towards even more  
59 problem-driven consortia types of funding science? And why exactly do scientists see  
60 that trend as a problem?

61         Notably, also a recent science studies paper (Falkenberg et al. 2022) urged  
62 national funders to stop modelling national schemes after the ERC. More specifically,  
63 these authors focus on the ERC as promoting a normative regime of innovation, of  
64 breakthrough science. Against this, and leaning on empirical evidence of several case  
65 studies, the authors argue that such innovation funding schemes only work if they are in a  
66 healthy balance with funding schemes that foster more incremental types of science. They  
67 called this the ‘breakthrough paradox’: too much funding towards breakthrough science  
68 will impede breakthrough science in the end. Also Scholten et al. (2021) have argued to

69 reduce funding towards excellence schemes because they foster too much competition.

70 These authors suggest rather providing funding to other types of funding schemes.

71 In this study, we report upon findings from a recent group interview study that  
72 provides epistemic reasons for strengthening ERC-type funding instead of consortia-type  
73 funding. We find that researchers prefer ERC-type funding not per se due to the  
74 innovation or excellence component, but because several aspects of the funding specifics  
75 align mostly faithfully with how they experience science should effectively be done, also  
76 in terms of impact: (1) in flexible and small-scale types of teams that focus on close  
77 collaborations and where team members can be added as seems most valuable to the  
78 science conducted rather than in loose networks that suffer from all kinds of frictions; (2)  
79 curiosity-driven rather than focusing on generating short-term impact that is experienced  
80 as highly unrealistic; (3) being autonomous and flexible in terms of choice of topics and  
81 methods rather than heeding to pre-structuring via funding calls that is sensed as  
82 complicating matters.

## 83 **Details of funding schemes**

84

### 85 *ERC*

86 ERC grants are essentially excellence schemes, meaning that they should provide the  
87 most talented scientists with money to pursue their ideas. These grants seem to have  
88 partly be modeled after US NSF research funding as well as after national excellence  
89 scheme precursors in the Netherlands, the so-called ‘Veni, Vidi, Vici’ schemes. ERC  
90 grants have a similar three-step funding scheme as the ‘Cesarian’ excellence schemes,  
91 going from smaller to bigger grants with a scientists’ seniority. ERC grants are also

92 explicitly coupled with a notion of breakthrough science, which often goes under the  
93 header of ‘high-risk high-reward’ funding. Basically, the idea is to not only provide  
94 excellent scientists with the money to do their research, but these scientists are also  
95 supposed to follow up on daring ideas, pushing the boundaries of science, innovate.  
96 Philosophically, the ERC seems to be built on a Kuhnian idea of revolutionary (versus  
97 normal) science (see also Falkenberg et al. 2022). An ERC grant should provide scientists  
98 with the possibility to make that ‘big leap’ away from normal science. Typically, the  
99 scientist gathers a team to do the proposed research.

100

#### 101 *Consortia science*

102 The development towards consortia science is often justified with the philosophical  
103 argument that current scientific and societal problems are sufficiently complex to require  
104 multi-dimensional expertise, and that they can therefore only be effectively addressed by  
105 large teams of scientists with different disciplinary backgrounds and the involvement of  
106 potential stakeholders (Wickson et al. 2006; Falk-Krzesinski et al. 2011; Milojević 2014;  
107 National Research Council 2015; Cundill et al. 2019). This is a theoretically attractive  
108 idea because any scientific or societal problem can then be addressed from multiple  
109 perspectives, in the hope to thus overcome any potential biases stemming from a specific  
110 discipline or focus that are thought to hamper progress, and to include all relevant factors  
111 and aspects. Such an approach could also increase chances of realistically developing and  
112 implementing any needed changes and interventions. And indeed, science scholars  
113 describe that inter - and transdisciplinary approaches are characterizing contemporary  
114 science (as opposed to post-war II fundamental science; see e.g. Gibbons et al. 1994).

115

116 Many science scholars actively promote the funding of such types of bigger  
117 collaborations, across disciplines and with stakeholders. Amongst science scholars, this  
118 way of doing science goes under a variety of names today, such as ‘Mode 2’ science  
119 (Gibbons et al. 1994), transdisciplinary science (Wickson et al. 2006), post-normal  
120 science (Funtowicz and Ravetz 1990), post-academic science (Ziman 2000), knowledge  
121 co-production (Bremer and Meisch 2017), knowledge co-creation (Regeer and Bunders  
122 2009), and (if it involves industries and universities) triple helix relations (Etzkowitz and  
123 Leydesdorff 2000). Finally, recent approaches often focus on RRI (Responsible research  
124 and innovation) concepts, which specifically aim to more flexibly integrate the science-  
125 society divide (Owen et al. 2012).

126

127 Perhaps not unimportantly, funding consortia science often goes well with politics,  
128 science policy and citizen engagement. By covering many dimensions, funding agencies  
129 can meet prevailing high standards of accountability via not leaving out any important  
130 factors or (political and social) dimensions. Finally, such type of science funding often  
131 explicitly focuses on immediate public needs. For example, Horizon Europe missions  
132 include fighting cancer and climate change, work towards cleaner oceans, waters, coasts  
133 and soils, as well as promote greener energy (Wallace 2020).

### 134 **Science studies on ERC and consortia science**

135 Overall, ERC and consortia science seem to be built up on two different types of  
136 epistemologies: break-through science (ERC) on the one hand, and co-creation science  
137 (consortia) on the other hand. The ERC is internationally seen as a big success story

138 (European Research Council 2019). A recent science study has shown that such  
139 excellence grants can indeed provide researchers with the resources to do significant  
140 work and give them epistemic and organizational autonomy (Scholten et al. 2021),  
141 though this is even more so the case for prize funding (Franssen et al. 2018). On the other  
142 hand, Scholten and colleagues have also shown that even if researchers have an  
143 excellence grant, there is a constant need to compete for future grants, a state they call  
144 ‘strategic anticipation’. Due to this competition, coupled with the fact that only few  
145 groups can benefit from excellence funding, Scholten and colleagues argue that it might  
146 help ‘to decrease the budget for excellence funding arrangements, allocating the rest of  
147 the funding to other funding programs or as block funding’. Also another science study  
148 has recently pushed the idea that excellence funding might not work well in practice, but  
149 due to another reason. Falkenberg (2021) found that funding schemes like the ERC with  
150 their focus on innovation can be in tension with at least some scientific practices towards  
151 how innovation works because also breakthrough science always needs normal science as  
152 a base. Falkenberg et al (2022) therefore argue that it would impede scientific  
153 breakthroughs in the end if all funding would be geared away from normal science  
154 towards breakthrough science in an ERC-style. Falkenberg and colleagues urge for a  
155 better balance between innovative and incremental science in the funding ecosystem.

156 Many science scholars are convinced that knowledge co-creation, on the other  
157 hand, does work well. Some have argued that it is socially responsible to push through a  
158 mode-2 type of science – even against the preferences of the researchers themselves (see  
159 e.g. Chubb and Reed 2017). What is needed if this creates friction is to educate scientists  
160 to value broader contexts and become more reflexive (e.g. Åm 2019), and/or to better

161 align the incentives of other stakeholders that can play a role in efforts towards more  
162 socially responsible science, such as universities (Sigl et al. 2020).

163 Science studies researchers investigating actual efforts of transdisciplinary  
164 research in practice, however, tell a somewhat different story. Across different domains  
165 of research practice, they all mark how difficult it is to do such type of research well. For  
166 example, while Ribeiro et al. (2019) remain convinced of the benefits, they also point to a  
167 host of challenges and problems inherent to transdisciplinarity in One Health research.  
168 They find high administrative and managerial burdens and major organizational and  
169 integrational challenges linked to the diversity of perspectives and power relationships  
170 involved in larger teams (see also Pohl and Hirsch Hadorn 2008). Likewise, researchers  
171 working on sustainability issues find that knowledge co-production between researchers  
172 and non-academic stakeholders can be very complex. Recent research in this area  
173 suggests that knowledge co-production does not always lead to positive effects and that  
174 far more research is needed to determine under what conditions knowledge co-production  
175 is effective and desirable – and when it would be better to abstain from it (Lemos et al.  
176 2018; Wyborn et al. 2019).

177 The National Research Council report (2015) urged that more research would be  
178 needed to understand how alternative funding strategies may affect team science  
179 effectiveness. Funding aimed to bridge the science-society divide, such as ELSA and RRI  
180 funding, has recently been shown to also have problems and trade-offs once being put  
181 into research practice (e.g. van Hove and Wickson 2017; Carrier and Gartzlaff 2019). It  
182 remains to be seen how the specifics of consortia science and ERC funding affect (team)  
183 science in practice.



## 184 **Empirical study: Methods and details**

185 Findings for this paper were extracted from interview sessions which we conducted in  
186 2017/2018 in the Netherlands and in Switzerland. In this research, we explored how  
187 active scientists experience and perceive the impact of competitive research funding on  
188 their science. This paper focuses on those statements and comments that can help to gain  
189 an understanding of the performative effects of both ERC and EU consortia funding  
190 schemes on scientific practice.

191

### 192 *Session participants and details*

193 For our research, we had conducted six group session interviews in two countries. The  
194 groups consisted of three to seven researchers, grouped by scientific domains (natural  
195 sciences, medical sciences, or humanities) and career status (junior = holding a temporary  
196 job position, or senior = holding a permanent position). This made a total of twelve group  
197 session interviews with in total 57 persons. Interviewees were recruited via personal  
198 networks as well as via Dutch and Swiss university websites and the website of the Royal  
199 Netherlands Academy of Arts and Sciences. This recruitment strategy resulted in a  
200 significant number of very experienced researchers, also with large-scale (consortia)  
201 funding, in particular amongst the permanent staff. Each session took around 3.5 hours.  
202 We taped the oral discussions and subsequently had them transcribed by a professional  
203 transcription bureau.

204 We also used 'Meetingsphere', a tool designed to allow anonymized digital  
205 interaction between the group members (<https://www.meetingsphere.com>). The  
206 interviews revolved around the themes of how competitive research funding affects  
207 science and how funding could be improved to foster good science. Group members were

208 first allowed to type their comments into the digital system. After saturation of  
209 commenting (typically after 10-15 minutes), we opened the system up for digital  
210 commenting, followed by extensive oral discussion. One of the groups ended up with oral  
211 discussion only (due to the delayed arrival of one participant).

212

### 213 *Analysis*

214 We used a thematic analysis to analyze the transcribed interviews and Meetingsphere  
215 reports. We here present exclusively the results concerning the interviewees' perceptions  
216 of EU-consortia and ERC funding<sup>1</sup>. Where it helps to understand the issues at hand, we  
217 also report on experiences with other national forms of funding (e.g. Dutch excellence  
218 funding and other forms of national consortia funding). We also made the decision to  
219 exclude the humanities from this paper as experiences in this field diverge too much from  
220 experiences in the medical and natural sciences and will therefore form a separate future  
221 paper. Regarding experiences in the natural and medical sciences, we basically found that  
222 there are three different themes connected to the ERC and consortia funding schemes that  
223 we present in detail here: type of collaborations, purpose of funding and organization of  
224 funding.

225

---

<sup>1</sup> In the Results, quotes are indicated. Where not obvious from the surrounding text, these quotes are accompanied by the following abbreviations to signalize who made the quote: med = researcher in a medical field; nat = researcher in a natural science field; jun = junior; sen = senior; NL = researcher currently based in the Netherlands; CH = researcher currently based in Switzerland

226

## 227 **Results**

228

229 *Type of collaborations: one PI and a close team versus a loose consortium network*

230 Our interviewees emphasized that one of the aspects in which ERC and EU consortia

231 funding differ is in the type of collaboration, which is not surprising given that this is

232 indeed one of the core differences between the two funding schemes.

233         The ERC is granting ‘hard-core personal subsidies’ (med sen CH), meaning this is

234 a grant awarded to a single person. This PI then can (and typically does) gather a team

235 around him/her who can co-work closely in the project. One Swiss senior medical

236 researcher thought that ERC grants are phantastic, they are ‘kind of an award’, even

237 though ‘the acceptance rate is going too low’. Across all the focus groups, we have not

238 heard one researcher saying that the collaborative structure within an ERC grant structure

239 was not working out as intended. This might not be so surprising as such teams are

240 flexible in size, put together by the PI and eventually work closely together within one

241 institution. Other science studies have found that working closely together makes for the

242 most easily-achieved successful types of collaborations, while looser types of networks

243 need well-coordinated organization, including physical getting-together, to become

244 successful (Hesjedal 2022). Also the social dynamics are found to be highly important for

245 success within a collaboration (Dusdal and Powell 2021; Hesjedal 2022).

246         In contrast to a personal grant such as an ERC, a consortium typically consists of

247 a loose and large network of researchers across universities. Many interviewees across

248 natural and medical science groups acknowledged that consortia are ‘a good incentive for

249 collaborative research’ (med sen CH). However, the general tendency of our natural and  
250 medical senior researcher interviewees who had experience with such funding was that  
251 they are not too happy with the resulting type of collaboration. One big issue was that the  
252 collaborations ‘often do not work very well- communications issues- between disciplines  
253 and need better support and guidance’ (med sen CH). And indeed, that such  
254 communication problems frequently occur in international big collaborations has been  
255 reported elsewhere (Dusdal and Powell 2021).

256 In general, researchers thought the bigger the consortia the worse they work in  
257 practice: ‘my subjective personal experience is that the larger the consortia are, the  
258 smaller is the input/benefit ratio’ (med sen CH). And a senior Dutch medical scientist  
259 said ‘I can’t say that I found the research better than the sum of its parts. In fact, it was  
260 worse...’. Similar to EU consortia, also for Swiss NCCR’s (National Centres of  
261 Competence in Science) which are national bigger types of consortia across 10-12  
262 collaborators, Swiss scientists experienced problems if too many people became  
263 involved; it resulted in that ‘you try to avoid meetings, because somebody constantly  
264 leaves the lunch meeting’ (med sen CH).

265 In a similar way than the medical researchers, Swiss natural scientists emphasized  
266 that bigger consortia might not always serve their purpose. For example, when one Swiss  
267 natural scientist emphasised the positive effects of funding because it ‘may push  
268 scientists to interact [via collaborations] and accelerate discovery’, another scientist  
269 immediately went against this: ‘True if it works that way. However, for large scale  
270 networks this may also lead to a lot of formal interaction without actual benefits’. Indeed,  
271 they experienced that EU Horizon projects were ‘more on paper than real’. Medical

272 scientists experienced this in a similar way: ‘It was not really a true collaboration. It was  
273 just opportunistic that people found each other, because they knew they could get easier  
274 money that way.’ And that if you ‘write it down in a nice way, then it looks fantastic, but  
275 it’s an empty bubble, really.’ (both quotes med sen NL)

276 In addition, it was also not clear how success in bigger consortia structures should  
277 be assessed. For example in connection with NCCR’s, one natural junior Swiss scientist  
278 said: ‘what do you harness as a success? That two of these centres somehow connect, or  
279 is it only a success if all of them connect and form a single structure, or is it just a success  
280 if you get two or three more links between them?’ The same reasoning holds for the  
281 bigger EU collaborative projects, where positive effects of networking were experienced  
282 but overall there were doubts that making such networks is worth the money: ‘It’s also  
283 the same for the European ones. I guess, I mean, the networks will perhaps not re-  
284 establish long-term structures, but they will perhaps still establish many small links. This  
285 may or may not- it’s certainly good, but I’m not sure if it’s... worth the money.’ (nat jun  
286 CH)

287 Another Swiss natural science junior researcher had personal experience with  
288 bigger consortia in the UK and was not impressed how these big consortia worked out in  
289 practice in that country. He/she called such consortia a ‘galactic waste of money’ and said  
290 that ‘a huge network just for the sake of making a huge network, I don’t see the point. It  
291 feels a little bit showering money down to academia just so that everybody has something  
292 to do’. In addition, ‘there have to be administrators. I don’t know, I don’t think it’s a good  
293 way...’. And again, other studies have pointed out that excessive administrative work can  
294 be a problem in such large-scale collaborations (Dusdal and Powell 2021). Our

295 interviewee emphasized instead the need to have funding for smaller interdisciplinary  
296 collaborations, not ‘gigantic things’ but instead ‘to work with a colleague’.

297 Swiss medical seniors also pointed out that another problem with such big  
298 consortia can be what kind of contribution you would want to do in such a big structure.  
299 That even though ‘the scope can be very ambitious... that doesn’t mean that within the  
300 consortium, you are doing the most ambitious contribution.’ It seems that this may have  
301 to do with ownership of scientific ideas and insights or perhaps because other members of  
302 the consortium may think in different ways. Again, this has been reported from other  
303 international large collaborations as well, and Dusdal and Powell (2021) therefore urge to  
304 make clear authorship deals and/ or be flexible with who is allowed to publish what.

305 Another related issue that our interviewees reported upon is that many researchers  
306 want to become part of a consortium (due to the money involved), even though their  
307 inclusion might have a negative effect on the overall outcome: ‘the larger, [...] the  
308 higher the danger is that many people are pushing themselves into such a construct, just  
309 bending their expertise a little bit in order to fit in. And there’s a lot of friction and  
310 constraint and loss of resources into that part’ (med sen CH). Again, also Dusdal and  
311 Powell (2021) urge that members in international big collaborations should be picked out  
312 well to align scientific backgrounds and contributions, and to reduce frictions due to  
313 communication problems or different research or epistemic cultures. In comparison, other  
314 types of collaborations do work well, Swiss senior medical scientists emphasized, for  
315 example the smaller interdisciplinary Swiss Synergia projects. These projects are small  
316 consortia of three to four members. You ‘can really work together in a different field. It  
317 makes sense. Creates community. Creates interaction.’ It is likely that such smaller

318 constructs are largely able to avoid the frictions and problems that have been identified  
319 for larger networks and can therefore harness successes more quickly and easily.

320         Several Dutch natural science seniors emphasized the problem that often high-  
321 achieving and visible researchers get invited to become a part of such consortia; these are,  
322 they say, always the same ‘usual suspects’. Such Matthew effects (alluding to that those  
323 researchers that have successes will easily gain more successes; Merton 1968) are well-  
324 known career effects in science and have already been described for gaining funding. Our  
325 interviewees here suggest that this effect also plays a role for who gets invited as  
326 collaborators. In fact, including such high-flyers would make strategic sense to increase  
327 success of getting the funding. Our Dutch senior natural science interviewees in any case  
328 got so annoyed by this effect that several of them have started to rather include  
329 researchers as collaborators that are fun to work with. Two scientists had independently  
330 put together proposals with such an idea in mind: ‘who would we actually want to work  
331 with?’ Rather than inviting the ‘usual suspects’, they invited ‘not the people who you see  
332 have the highest publication record, but just people that can take this challenge and think  
333 beyond, really thinking out of the box, are creative and team workers, and all these other  
334 skills, and who are nice people to have around because if you’re locked up in a room for a  
335 week you have to like them...’ (nat sen NL). Interestingly, recent science studies suggest  
336 that this may be a strategy that could pay off extremely well in practice: Dusdal and  
337 Powell (2021) recommend to not neglect the social factors that matter for successful  
338 collaborations, such as being friends (see also Hesjedal 2022).

339  
340

341 *Purpose of funding: Curiosity-driven versus impact-driven science*

342 ERC grants are curiosity-driven bottom-up grants, supporting fundamental science, while  
343 consortia funding schemes are geared towards generating societal impact. We did receive  
344 many positive and absolutely no negative statements regarding the purpose of funding  
345 fundamental science with ERC grants, while there were plenty of negative comments  
346 regarding impact-driven science, across the interviewed medical and natural science  
347 groups.

348         One Dutch medical senior scientist emphasized that team science as funded by the  
349 ERC does function well, basically because there is no other agenda than the science itself  
350 behind it: ‘because those are hard-core, personal subsidies with no commercial interests  
351 whatsoever... that’s why group science really flourishes there. There’s no financial or  
352 economic agenda hidden behind it. Whereas, for all others, there are these  
353 considerations.’ Also Swiss medical senior scientists emphasized that the ERC is very  
354 different from other EU programmes because the ERC is scientific research while many  
355 other programmes do have a secondary objective. For example, when regarding Horizon  
356 2020: ‘this is research to which a lot of other things have been loaded on top and then this  
357 is, sort of, a very mixed bag, which I think is very different from the ERC, which is a  
358 research project.’ (med sen CH)

359         Two Dutch medical seniors also emphasized that this positive effect is partly also  
360 true for the Dutch excellence grants – at least once you have these types of grants they are  
361 pretty flexible, ‘you can just spend the money on what you want’. The underlying reason  
362 for why they say that you first need to get them and only then you are free to do as you



363 wish may relate to the fact that also Dutch excellence grants are judged by their lengthy  
364 valorisation section during proposal peer review (de Jong 2015; Brenninkmeijer 2022).

365         Senior medical Dutch researchers all agreed that EU-Horizon proposals are driven  
366 too much by impact. One highly experienced researcher with many grants, including  
367 Horizon 2020 grants, even claimed that they are ‘hot air’; they promise impacts that  
368 cannot be realized, and ‘those proposals are empty proposals’. Dutch medical researchers  
369 differed whether the underlying science base needs to be good or not, though. But they  
370 did all agree that the time frame is completely off: ‘...they use these words like, “We will  
371 abolish dementia from the world” and things like that... I’m like, be realistic, within three  
372 or four years, you’re not going to do those things.’ This may be due to ‘the economic  
373 push, people want to see a return of investment in three or four years.’ However, this is  
374 highly unrealistic in medical realities even when considering medicine that is now  
375 considered highly successful: ‘the proper timeline for return of investment should be, at  
376 least, 15 years to 30 years. Not three years. It’s unrealistic. So, I don’t know why they  
377 require you to write that in the proposal.’ (med sen NL) Like their Dutch colleagues,  
378 medical senior scientists highlighted that the expected impact time horizon often is highly  
379 unrealistic (here: regarding Horizon 2020 consortia): ‘You know, they make programmes  
380 to find new a new drug against depression in five years. I mean they will just fail, there’s  
381 no question.’ (med sen CH)

382         One Swiss senior medical researcher thought that it would be important for  
383 funding agencies to understand how scientific breakthroughs work in practice: ‘I think  
384 every major scientific breakthrough has come out of probably some surprised discovery  
385 that was completely unplanned. From, probably, people who were looking for something

386 else.’ (med sen CH) This means planning in the direction of impact, and for sure short-  
387 term impact, is probably not working, according to this scientist. What is more, scientific  
388 findings that did not seem important at first can lead to a breakthrough decades later.  
389 Other medical scientists alluded to the same problem: ‘If something is predictable, you  
390 cannot call it research.’ (med sen NL; with other colleagues agreeing to this).

391         The Swiss senior medical researcher added that it would therefore be ‘important  
392 to tell the public that they have to be able to tolerate a huge amount of... not successful  
393 experiments and labs.’ And that ‘they have to understand that really big discoveries were  
394 made not with plans to make them.’ The only thing that would help, according to this  
395 medical scientist, is to hire people with a certain personality, who are ‘curious and  
396 diligent and, actually, really follow up things’. So essentially ‘for the system to  
397 work...there has to be a certain basis of rewarding such, literally, playing around’. And  
398 one could historically argue that ‘every major discovery has come from such type of  
399 behaviour’. It is interesting to see here that this researcher essentially makes a move from  
400 a focus on impact to a focus on the scientist as a person, and that this researcher thinks  
401 even in terms of long-term impact it would be more valuable to fund persons (as in an  
402 ERC grant) rather than impact-driven consortia.

403         Medical senior researchers also talked about problems with stakeholder  
404 involvement required by Dutch funding agencies. In particular the currently often-made  
405 requirement of co-funding (meaning that stakeholders are supposed to also co-fund the  
406 research), ‘is extremely limiting’. It in practice inhibited this researcher to submit an  
407 important grant proposal because it could not be realized before the end of the submission  
408 deadline. This researcher complained that ‘I don’t know why they make such a strong

409 requirement.’ Another researcher thought that the underlying reasons are ‘to show that  
410 those parties are really interested and willing to give money and, also, give time and  
411 effort to it I think. At least, in our field, it’s not so much industry but local care  
412 companies or whatever.’ (med sen NL) Interestingly, when asked what this researcher  
413 thought about involving care companies, the researcher said that ‘it only makes things  
414 more complex. And doesn’t necessarily say so much about how interested they [the local  
415 care companies] are.... It can, more, be a hurdle than something else...’ Several other  
416 medical researchers in the group agreed with this. This researcher then also questioned  
417 whether the fact that such companies need to pay money would make it ‘more valuable  
418 for them.’ This is interesting in connection with co-creation ideas: our interviewees  
419 essentially experienced that involving stakeholders does in fact not help but rather  
420 complicates the research process.

421 Dutch medical senior researchers also added that the Dutch medical funder  
422 ZonMw does not merely expect co-creation but also expects a firm plan for  
423 implementation. However, this can be premature: ‘you also get that you don’t know, yet,  
424 if something works, but you already have that plan for implementation.’ And what is  
425 more, this all complicates the research process to a degree that the core research cannot  
426 be attended to in a manner that it would deserve, for example because budget needs to go  
427 towards implementation. It thus seems that at least for Dutch ZonMw grants, added  
428 aspects of co-creation and implementation in short-term research funding schemes may  
429 have a negative effect on the research as well as even on the eventual societal impact.  
430 Funder plans are experienced as over-ambitious, with several Dutch senior medical  
431 researchers sharing this experience.

432           Natural scientists had other worries than their medical colleagues: they mostly  
433 worried about a push away from basic research towards applied research via the need for  
434 funding. Indeed, only one researcher, a Swiss senior natural scientist, was really thinking  
435 applied research should perhaps be valued more than it now is. For example, one Swiss  
436 junior worried that ‘research topics with low expected/unknown society impact might not  
437 get funded’. And that ‘one tends to start thinking of projects in terms of whether they are  
438 “presentable”, as in likely to get funding...’ For example, one Swiss junior natural  
439 scientist expressed the worry that ‘It would be disastrous if competitive funding schemes  
440 would push research away from fundamental science.’ Another colleague answered to  
441 this: ‘unfortunately this is happening in selected countries’ (as indeed evidenced by e.g.  
442 Dutch natural scientists). Another natural researcher also worried about the decreasing  
443 amount of funding towards basic science. He/she thinks that we ‘should promote basic  
444 science because there is a strong, strong pressure for innovation and transaction of  
445 science, and if you kill basic science- in many countries the funding is decreasing for  
446 basic science.’ For example, there are increasing problems in Horizon 2020 funding,  
447 which ‘doesn’t recognise enough basic science in the way they rate the projects.’

448           And while one researcher wrote that funding might offer ‘a way for resource  
449 providers to guide research into topics that are relevant for their interests’, other Swiss  
450 natural junior researchers were quite sceptical about such developments: For example one  
451 wrote that the Swiss funder SNSF ‘definitely requires societal impact, ideally  
452 collaborations with industry, possible applications, so a lot of people in my field,  
453 including myself, have rather unrealistic writeups about super-blue-sky technology that  
454 may or may not every actually hit the ground.’

455           Also Dutch senior natural scientists worried about decreasing funding for basic  
456 science. Though some did see some positive aspects as well, for example that it ‘sparks  
457 creative coupling between science and industry.’ However, they also worried for example  
458 that there might be a ‘risk of over-focus on certain disciplines where societal relevance or  
459 applicability is more evident.’ Another remark was alluding to that research questions get  
460 ‘increasingly defined by applicability of the output’. One researcher wrote: ‘Over-  
461 emphasis on applied research and connections to industry. If projects/research fit, then  
462 can be a benefit. But definitely hinders very fundamental research.’ The same researcher  
463 then went on to say that it is ‘negative that nearly all 100% fundamental project funding  
464 possibilities in the Netherlands are being eliminated. Even the Science Agenda is now  
465 funded with contributions from industry.’ The national science agenda in the Netherlands  
466 had been an interesting funder experiment: An agenda for important topics for science  
467 had been established by asking the public for input. The Dutch funding agency then gave  
468 money to fund some of these agenda points. What this researcher here is worrying about  
469 is that this initiative, originally in principle disconnected from any applied aspects, now  
470 did get connected to applied aspects anyway.

471           Some natural science researchers succinctly emphasized the two-sidedness of  
472 collaborating with industry: ‘By having to connect with industry for funds, ability to  
473 discuss and plan research directions can be fruitful. But also very frustrating if a great  
474 fundamental question but not relevant enough for industry.’ One researcher then said that  
475 it helps to engage the industry early on in a project, not wait too long, and then there  
476 sometimes are even positive surprises what industry is interested in. Another - medical -  
477 researcher had a different but also successful strategy: to answer questions which are

478 being posed by industry, which, this researcher said, ‘I’m not necessarily agreeing that  
479 will change the world’. But then, this researcher also makes sure to get a deal with ‘a  
480 huge chunk of money to do the things I want to do’. (med sen NL)

481 Simultaneously, two Dutch senior natural science researchers worried that the  
482 time horizon from research funding might in any case be too short to address the societal  
483 problems that we really would need to address: ‘Long term research is being prevented.  
484 Big societal problems require long term data.’ Another researcher fully agreed and added  
485 that ‘monitoring programs are being stopped. No incentive for scientists to continue this.’  
486 Interesting is here that this utterance seems to relate to research that has in fact no  
487 connection to industry at all, but concerns monitoring biodiversity. So these worries are  
488 about societal problems that are not about applied science, do not necessarily need big  
489 collaborations, consortia or the involvement of stakeholders, and are not interdisciplinary  
490 projects. They are, indeed, straightforward and incremental science, just needing a long-  
491 term funding horizon. But they do carry a high societal function.

492

493 *Organization of funding: relatively free versus detailed pre-given structures*

494 While ERC grants are relatively flexible in terms of topics and methods, consortia grants  
495 are quite pre-structured. Again, this was quite visible amongst the comments we received  
496 from researchers, with the inflexibility of consortia grants as being seen as problematic  
497 while the flexibility and autonomy provided in ERC-type grants as being appreciated.  
498 ‘[About ERC] It’s amazing, amazing the success, and this is really basic research. It’s  
499 bottom up. The researchers come with their projects. Nothing is imposed by politicians or

500 whatever, which is not the case for the collaborative projects. So it's really, really a  
501 fantastic institution.' (nat sen CH)

502         One Swiss medical senior researcher commented that it might be positive that  
503 'one can guide research directions of national or international importance by specific  
504 calls.' However, several Swiss and Dutch medical researchers emphasized that European  
505 Horizon 2020 grants might be highly problematic exactly because of this guidance. The  
506 problem with this, as researchers see it, is that this allows for researchers to impact the  
507 agenda-setting 'before the original call comes out. Because you can influence what's on  
508 the list.' One Dutch researcher said that this could even be seen as a game 'that you can  
509 play very well. And then, hopefully, it's played by people with high integrity and not  
510 only for their own careers.' The reason that this is possible, according to one Swiss junior  
511 medical scientist, is that 'there are all these EU bureaucrats and they didn't even know  
512 what to do with all the money, so they are desperate to have some professors telling them  
513 what to do with the money, and these professors then, of course, write exactly the thing  
514 that they need for their own research.' And this is exactly what happened when this  
515 researcher eventually became part of this 'lobbying group: There were 20 people who  
516 were phrasing this Horizon 2020 page in exactly the way so that our project would fit.  
517 This is insane.'

518         In addition, medical researchers do in general not value the amount of detailed  
519 proposal-writing, most of which has nothing to do with science itself: 'these big Horizon  
520 2020 consortia... it's total seventy pages, such proposals, science is only four pages.'  
521 (med sen NL). Several Swiss medical seniors also experienced that EU consortia projects  
522 in practice 'don't seem to work well'. These researchers compared Horizon 2020

523 consortia schemes to the Swiss NCCR's and thought that analogously to the latter,  
524 European consortia are also 'guided by particular ideas that sort out what we probably  
525 think as the most creative research.' (med sen CH) One main underlying reason for why  
526 NCCR consortia are experienced as not working well is because they aim to not only  
527 foster high-quality science but also have other, more political, criteria attached to them.  
528 These extra criteria are then experienced as seriously complicating matters.

529         How this works in detail has been described by a Swiss medical senior who  
530 described the succession of several NCCR calls where extra criteria had been added only  
531 in later calls. In the beginning of these NCCR's (first call), this researcher emphasized,  
532 'the intention was a very good one and it worked very well'. But then, this researcher  
533 goes on, 'came, of course, the second and the third wave. And then people put all kinds of  
534 additional thoughts into this. Should be regional, there should be industry and there  
535 should be a very significant amount of junior funding.[...] and so it was watered down  
536 until you had so many criteria that science was just one of them. I think the system broke  
537 down.' (med sen, CH) When asked, this researcher emphasized that it was not the amount  
538 of money itself that was problematic here (this first call 'transformed research, no  
539 doubt'), but that the problem was that due to political pressures other aspects than science  
540 started playing a role as well: 'the money was significant enough that politicians became  
541 interested in this. And from that point on, I would simply say it was watered down.' The  
542 problem, according to Swiss senior medical scientists, is that there was too little academic  
543 freedom left, there was in the end 'Too much other influences outside of the science.'  
544 Also a natural scientist worried that the funding situation in Switzerland might get worse  
545 due to such pressures to justify funds: 'Unfortunately, because of all the pressure around



546 us, we're also going downhill.... There is a lot of pressure to be more competitive, to add  
547 more around it, to justify the funds. I think the politicians don't always understand how  
548 the science works.' (nat sen CH)

549         The problem, according to Swiss senior medical researchers, occurs if you add too  
550 many other aspects aside from the science itself, aside from aspects regarding scientific  
551 excellence. If you try to serve too many agenda's, 'then you are nowhere. Then you don't  
552 know where your attention is.' And then it goes wrong, according to those researchers,  
553 even though they do understand and value the reasoning behind it: that due to the big  
554 amount of money put into such NCCR's 'obviously, people look at this very carefully.'  
555 And that then politicians think 'if this is so much money, you have to fulfil, at least, five  
556 secondary roles as well.' But then, these researchers perceive, matters go into the wrong  
557 direction, at least in terms of science. A Swiss junior natural scientist emphasized that in  
558 general one would need to 'reduce the number of boxes you have to tick, because if you  
559 want to do everything then you achieve nothing.' And another Swiss natural scientist said  
560 that EU projects are 'almost not worth the money you get. I have too many of those.' In  
561 his/her eyes, the main problem is 'The amount of work you have around with managing  
562 it...'

563         Another issue are smaller interdisciplinary Swiss Synergia projects, according to  
564 Swiss senior medical researchers, which are small consortia of three to four members.  
565 These work well in the eyes of the medical senior interviewees. 'The Synergia is very  
566 focused. I think this has never run into the secondary problems [that NCCR's and EU  
567 consortia have, according to these medical researchers].'

568            Interestingly, one senior Swiss natural scientist with personal experience of both  
569 NCCR's and ERC's was very happy with NCCR's, because they can 'give you [the  
570 individual researcher] time' to venture into new fields, try out new things. The conditions  
571 under which this can happen, this researcher emphasized, is if the director lets you do so,  
572 provides the researchers with sufficient autonomy, if he/she says: 'You just use your  
573 money however you want to use it.' Also Dusdal and Powell (2021) emphasized that the  
574 person in charge of the network has an important function to shape the collaboration.

575

## 576 **Discussion**

577 We find that researchers prefer ERC-type funding not per se due to the innovation or  
578 excellence component, but because several aspects of the funding specifics align mostly  
579 faithfully with how they experience science should effectively be done, also in terms of  
580 impact.

581            First, researchers across groups experience that science conducted in big consortia  
582 networks does not seem to work well in practice: the networks are too loose to be  
583 effective, and members might push into such structures who do not help but instead might  
584 even decrease the quality of the resulting science. In addition, individual members might  
585 not do their best in such bigger teams, perhaps due to ownership issues. There is also  
586 clearly added bureaucracy and communication problems across different groups in such  
587 large multi-disciplinary and international groups (see also Dusdal and Powell 2021 for  
588 similar findings). Even in smaller teams, the epistemic distance between members from  
589 different disciplines can provide substantial challenges (Stephens and Stephens 2021).  
590 Researchers in our study have not reported the same types of troubles occurring in ERC-

591 like types of teams that work closely together and are epistemically more aligned. It is  
592 also likely that the PI in an ERC grant acts as an anchor point around which all actions  
593 are concentrated. What is more, the PI also has the flexibility to choose team members  
594 that would function socially within the team. Several recent papers have outlined how  
595 important such social aspects are to do good collaborative work (Dusdal and Powell  
596 2021; Hesjedal 2022).

597         Secondly, and perhaps most importantly, researchers across groups are highly  
598 skeptical of impact-driven funding schemes, such as EU consortia funding (but also other  
599 national ones). Medical researchers experience that such short-term impacts are  
600 essentially highly unrealistic in terms of their time horizon. Natural researchers express  
601 that some of the most socially valuable scientific work would simply need a long-time  
602 horizon and not a big network to perform (such as monitoring). Medical researchers point  
603 out that involving stakeholders is in practice experienced as very difficult, both because it  
604 is not always clear how this should happen and what they could contribute, but also  
605 because it can have adverse effects of too little time to do the core work. This can result  
606 in overhasty implementation. Indeed, also other studies have highlighted such challenges,  
607 suggesting that one would need to analyze in which cases it does indeed pay off (Lemos  
608 et al. 2018; Wyborn et al. 2019). Some of our researchers told us how they flexibly deal  
609 with such challenges in practice: For example, natural researchers experience that  
610 industry can have very different goals, but that it can work out if the collaboration is done  
611 with a lot of care and communication. One medical researcher said that it can work out to  
612 simply perform what industry wants and then keep some of the money to do interesting  
613 fundamental work on the side. Finally, medical researchers highlight that real impact

614 cannot be planned in such manner – real scientific breakthroughs are essentially  
615 unpredictable, and findings can pay off only decades later (see also Copeland 2019).  
616 What this all often results in is that researchers have the feeling to have to lie, to have to  
617 overpromise, regarding impact in grant proposals. They are ‘hot air’. One researcher  
618 suggested that the only thing that could be done to foster impact would be to reward  
619 researchers with a certain personality of being curious, working diligently, and playing  
620 around. In essence, that sounds more like the rewards provided via a curiosity-driven and  
621 personal ERC grant. In addition, many natural science researchers were highly worried  
622 about basic funding receiving too little of its share, both in national and in EU funding;  
623 current funding schemes even being a threat to fields that are more fundamental.

624         Third, researchers experienced that the pre-structuring of consortia-type funding  
625 schemes is not valuable. For example, while medical researchers appreciate that  
626 specialized calls might enable policy makers to target science towards solving specific  
627 problems, the process in which such calls in EU funding are being made in practice is  
628 experienced as too biased. Several of our medical interviewees, who had insider  
629 experience, said this is essentially like ‘a game’, in which researchers may even tailor  
630 calls to suit their own needs. Also, the types of detailed proposals for EU consortia calls  
631 are clearly not being appreciated; a large part of these proposals not even having anything  
632 to do with the proposed science. And even though several of our interviewees can  
633 understand why politicians would feel forced to make big-budget science more  
634 accountable by adding further elements, both medical and natural science researchers  
635 experienced that such added elements (beyond scientific ones) were overall distractive  
636 and complicated matters. One researcher said that apparently politicians don’t always

637 understand how science works. Another researcher put it as such: ‘If you want to do  
638 everything you achieve nothing.’ Consequently, this researcher (and others) suggested  
639 that the less boxes you must tick in a funding application the better for the resulting  
640 science. Funding that allows for more autonomy and flexibility was clearly experienced  
641 as more valuable by most of our interviewees – and this could even happen in bigger  
642 structures if the person in charge allows for it.

643         Against the arguments of other science studies colleagues (Scholten et al. 2021;  
644 Falkenberg et al. 2022), we argue that it might be most valuable to channel even more  
645 money towards ERC-types of funding, thus reducing the adverse effects of competition,  
646 rather than pulling budget over to other types of more top-down funding schemes. Our  
647 suggestion is in line with findings showing that research may thrive better if researchers  
648 are provided with sufficient autonomy, including the possibility to play around (Laudel  
649 2006). Indeed, scientists may value the ERC precisely because, as Roumbanis (2019) puts  
650 it, many universities in Europe ‘have taken on a more market-oriented approach that has  
651 changed the core of academic work life.’ In this context, the need for ‘protected spaces’  
652 (Laudel 2017) in which scientists can work on meaningful research for which they are  
653 intrinsically motivated seems higher than ever. Also the KNAW (2019) argues that the  
654 Dutch research funder NWO should (re)tailor more of its funding for such types of free  
655 science and away from agenda-driven science (and importantly, there was very recently a  
656 political decision to fund more investigator-driven science in the Netherlands). Even with  
657 regards to the UK REF, experts start appreciating that “pre-conditions for such [research]  
658 governance include intellectual freedom in research” (Oancea 2019).

659           Importantly, also other recent evidence shows that a freer investigator-led approach  
660 does not preclude addressing applied or problem-generated topics, such as climate change  
661 or clean oceans. For example, a 2018 evaluation report of ERC projects showed that  
662 nearly half of the funded projects already have a societal impact, while around 75% are  
663 predicted to do so in the longer term - and that without societal impact being a criterion of  
664 selection (European Research Council 2019; this evaluation was assisted by independent  
665 experts selected by the ERC). The report also showed that many ERC projects are  
666 strongly interdisciplinary, with around 70% of the evaluated projects having led to results  
667 applicable to other areas of research, while around 60% of them brought together two  
668 previously rather unconnected research areas.

669           Scientists in our study also experienced very positive effects from Swiss Sinergia  
670 funding, which provides relatively free types of funding for interdisciplinary small-scale  
671 projects (see also Ayoubi et al. 2019). Our findings suggest that such types of teams may  
672 cultivate an optimal form of focused collaboration, which Hanson (2018) called  
673 ‘disciplined collaboration’ in the business world. As such, scientific collaboration might  
674 work best if it steers a middle course between under-collaboration (isolation) and over-  
675 collaboration (unnecessarily complex forms of cooperation that have a negative effect on  
676 work performance), with disciplined collaboration producing the best and most effective  
677 results. Arguably, also ERC-type funding leads to such disciplined collaboration.

678           That researchers in general are already overworked, lacking time and feeling that  
679 they have little ‘space to maneuver’ (Åm 2019; see also Sigl et al. 2020) is an often-heard  
680 complaint increasingly being made by researchers (see e.g. Wellcome Trust report 2020).  
681 Interestingly, Åm (2019) cites older scientists who feel that there was simply more space

682 and freedom for good discussions in earlier decades, and that this by itself led to an  
683 increased degree of reflexivity. Åm further advises that effectively incorporating aspects  
684 of responsible research and innovation only works in practice if such space and freedom  
685 (again) is provided, and that it in addition is mandatory that scientists develop a sense of  
686 ownership of such concepts. These ideas integrate well with our own findings on the need  
687 for focus, time, freedom and ownership – and that this could ultimately lead to better  
688 research also in a societal sense.

689 In conclusion, we suggest that it is important to rethink the recent international  
690 drive towards multidimensional consortia funding schemes. Our study suggests that it  
691 might be more important to invest more in investigator-led ERC-types of science, and  
692 that this might not be to the detriment of societal involvement and relevance (see also  
693 KNAW 2019, 2020). It seems that what researchers nowadays increasingly lack is the  
694 time and the necessary academic freedom to focus their work in the most efficient ways.

695

## 696 **Funding**

697 This work was supported by the Dutch medical funding agency ZonMw for the research  
698 project ‘Follow the Money’, which was part of the ZonMw-programme ‘Fostering  
699 responsible research practices’ (grant # 445001004, to Herman Paul).

700

## 701 **Acknowledgements**

702 First of all, we would like to thank our interviewees in the Netherlands and Switzerland  
703 for taking the time to share their insights with us. We would also like to thank the Swiss

704 Academies of Arts and Sciences, and in particular Roger Pfister, for hosting the sessions  
705 in Switzerland. We are also indebted to Gerd Folkers, who guided us and provided  
706 contacts to Swiss scientists. We also thank the Royal Netherlands Academy of Arts and  
707 Sciences, and Jean Philippe de Jong in particular, for helping to contact interviewees,  
708 hosting the discussion sessions in The Netherlands and engaging the Swiss Academies in  
709 the project. We also thank Jean Philippe for his comments and edits on a previous version  
710 of this manuscript. Furthermore, we would like to thank Jeannette Pols, Barend van der  
711 Meulen and Peter van Hoesel for good advice throughout our project, as well as Danny  
712 van den Boom with helping to make the Meetingsphere sessions a success.

713

714

715



## 716 **References**

- 717 Åm, H. (2019) ‘Limits of decentered governance in science-society policies’, *Journal of*  
718 *Responsible Innovation*, 6:163-178.
- 719 Ayoubi, C., M. Pezzoni, and F. Visentin (2019) ‘The important thing is not to win, it is to  
720 take part: What if scientists benefit from participating in research grant  
721 competitions?’, *Research Policy*, 48:84-97.
- 722 Bremer, S., and S. Meisch (2017) ‘Co-production in climate change research: reviewing  
723 different perspectives.’, *WIREs Climate Change*, 8:e482.
- 724 Brenninkmeijer, J. (2022) ‘Achieving societal and academic impacts of research: A  
725 comparison of networks, values, and strategies.’, *Science and Public Policy*, scac022.  
726 DOI: <https://doi.org/10.1093/scipol/scac022>.
- 727 Carrier, M., and M. Garzloff (2019) ‘Responsible research and innovation: hopes and  
728 fears in the scientific community in Europe.’, *Journal of responsible research*  
729 *innovation*, 7/2:149-169.
- 730 Chubb, J., and M. Reed (2017) ‘Epistemic responsibility as an edifying force in academic  
731 research: investigating the moral challenges and opportunities of an impact agenda in  
732 the UK and Australia.’, *Palgrave Communications*, 3:20.
- 733 Copeland, S. (2019) ‘On Serendipity in Science: Discovery at the Intersection of Chance  
734 and Wisdom.’, *Synthese*, 196:2385–2406.
- 735 Cundill, G., B. Currie-Alder, and M. Leone (2019) ‘The future is collaborative.’, *Nature*  
736 *Climate Change*, 9:343–347.
- 737 De Jong, S. (2015) *Engaging scientists: organising valorisation in the Netherlands*. PhD  
738 thesis, Leiden University, Netherlands.
- 739 De Rijcke, S., and J. Wilsdon (2019) ‘Europe the rule-maker.’, *Nature*, 569:479-481.
- 740 Dusdal, D. J., and J. J. W. Powell (2021) ‘Benefits, Motivations, and Challenges of  
741 International Collaborative Research: A Sociology of Science Case Study.’, *Science*  
742 *and Public Policy*, 48/2:235–245.
- 743 Etzkowitz, H., and L. Leydesdorff (2000) ‘The dynamics of innovation: from National  
744 Systems and “Mode 2” to a Triple Helix of university–industry–government  
745 relations.’, *Research Policy*, 29:109-123.
- 746 European Research Council (2019) *Qualitative evaluation of completed projects funded*  
747 *by the European Research Council 2018*. European Commission document.  
748 Available at [https://erc.europa.eu/content/qualitative-evaluation-completed-projects-](https://erc.europa.eu/content/qualitative-evaluation-completed-projects-funded-european-research-council-2018)  
749 [funded-european-research-council-2018](https://erc.europa.eu/content/qualitative-evaluation-completed-projects-funded-european-research-council-2018). (accessed 25 July 2022).

- 750 Falkenberg, R. I. (2021) ‘Re-invent Yourself! How Demands for Innovativeness Reshape  
751 Epistemic Practices.’, *Minerva*, 59:423–444.
- 752 Falkenberg, R. I., Fochler, M., Sigl, L., Bürstmayr, H., et al. (2022) ‘The breakthrough  
753 paradox. How focusing on one form of innovation jeopardizes the advancement of  
754 science.’, *EMBO Reports*, 23:e54772.
- 755 Falk-Krzesinski, H. J., et al. (2011) ‘Mapping a research agenda for the science of team  
756 science.’, *Research Evaluation*, 20:145–158.
- 757 Franssen, T. Scholten, W., Hessels, L. K., and de Rijcke, S. (2018) ‘The drawbacks of  
758 project funding for epistemic innovation: Comparing institutional affordances and  
759 constraints of different types of research funding.’, *Minerva*, 56(1):11–33.
- 760 Friends of the ERC, letter. Available at <https://friendsoftheerc.w.uib.no>. (accessed 24 July  
761 2022).
- 762 Funtowicz, S. O., and J. R. Ravetz (1990) ‘Post-normal science: A new science for new  
763 Times.’, *Scientific European*, 266:20–22.
- 764 Gibbons, M. et al. (1994) *The New Production of Knowledge: The Dynamics of Science  
765 and Research in Contemporary Societies*. London: Sage.
- 766 Hanson, M. T. (2018) *Great at work: How top performers do less, work better and  
767 achieve more*. London: Simon & Schuster UK Ltd.
- 768 Hesjedal, M. B. (2022) ‘Socializing scientists into interdisciplinarity by placemaking in a  
769 multi-sited research center.’, *Science, Technology, & Human Values*,  
770 01622439221100867.
- 771 KNAW (2019) *Evenwicht in het wetenschapssysteem. De verhouding tussen ongebonden  
772 en strategisch onderzoek*. Amsterdam: KNAW.
- 773 KNAW (2020) *Het rolling-grantfonds. Kloppend hart voor ongebonden onderzoek*.  
774 Amsterdam: KNAW.
- 775 Laudel, G. (2006) ‘The art of getting funded: how scientists adapt to their funding  
776 conditions.’, *Science and Public Policy*, 33/7:489–504
- 777 Laudel, G. (2017) ‘How do national career systems promote or hinder the emergence of  
778 new research lines?’, *Minerva*, 55:341–369.
- 779 Lemos, M. C. et al. (2018) ‘To co-produce or not to co-produce.’, *Nature Sustainability*,  
780 1:722-724.
- 781 Merton, R. K. (1968) ‘The Matthew effect in science.’, *Science*, 159:56-63.

- 782 Milojević, S. (2014) ‘Principles of scientific research team formation and evolution.’,  
783 Proceedings of the National Academy of Sciences, 111:3984–3989.
- 784 National Research Council (2015) *Enhancing the Effectiveness of Team Science*.  
785 Washington, DC: The National Academies Press.
- 786 Oancea, A. (2019) ‘Research governance and the future(s) of research assessment.’,  
787 Palgrave communications, 5:27.
- 788 Owen, R., P. Macnaghten, and J. Stilgoe (2012) ‘Responsible research and innovation:  
789 From science in society, to science for society, with society.’, Science and Public  
790 Policy, 39:751–760.
- 791 Pohl, C., and G. Hirsch Hadorn (2008) ‘Methodological challenges of transdisciplinary  
792 research.’, Natures Sciences Sociétés, 16:111-121.
- 793 Regeer, B., and J. Bunders (2009) *Knowledge co-creation: Interaction between science  
794 and society. A transdisciplinary approach to complex societal issues*. Den Haag, The  
795 Netherlands: RMNO.
- 796 Ribeiro, C. S., L. H. M. van de Burgwal, and B. J. Regeer (2019) ‘Overcoming  
797 challenges for designing and implementing the One Health approach: A systematic  
798 review of the literature.’, One Health, 7:100085.
- 799 Roumbanis, L. (2019) ‘Symbolic violence in academic life: a study on how junior  
800 scholars are educated in the art of getting funded.’, Minerva, 57:197–218.
- 801 Scholten, W., Franssen, T. P., van Drooge, L., de Rijcke, S., and L. K. Hessels  
802 (2021) ‘Funding for few, anticipation among all: Effects of excellence funding on  
803 academic research groups.’, Science and Public Policy, 48:265–275.
- 804 Sigl, L., U. Felt, and M. Fochler (2020) “‘I am Primarily Paid for Publishing...’: The  
805 Narrative Framing of Societal Responsibilities in Academic Life Science Research.’  
806 Science and Engineering Ethics, 26:1569–1593.
- 807 Stephens, N., and P. Stephens (2021) ‘Interdisciplinary Projects as an Expert-Network :  
808 Analysing Team Work Across Biological and Physical Sciences.’, Science and  
809 Technology Studies, 34/4:56–73.
- 810 Van Hove, L., and F. Wickson (2017) ‘Responsible research is not good science:  
811 Divergences inhibiting the enactment of RRI in nanosafety.’, Nanoethics, 11:213–  
812 228.
- 813 Wagner, C. S. (2018) *The collaborative era in science: governing the network*. Palgrave  
814 Macmillan.
- 815 Wallace, N. (2020) ‘Europe unveils targets for hyped research ‘missions’.’  
816 doi:10.1126/science.abe8997.

- 817 Wellcome trust report (2020) *What researchers think about the culture they work in.*  
818 London, UK: Wellcome Trust. Available at [https://wellcome.ac.uk/reports/what-](https://wellcome.ac.uk/reports/what-researchers-think-about-research-culture)  
819 [researchers-think-about-research-culture](https://wellcome.ac.uk/reports/what-researchers-think-about-research-culture) (accessed 25 July 2022).
- 820 Wickson, F., A. L. Carew, and A. W. Russell (2006) ‘Transdisciplinary research:  
821 characteristics, quandaries and quality.’, *Futures*, 38:1046–1059.
- 822 Wyborn, C. (2019) ‘Co-producing sustainability: Re-ordering the governance of science,  
823 policy, and practice.’, *Annual Review of Environment and Resources*, 44:3.1-3.28.
- 824 Ziman, J. (2000) *Real science: What it is and what it means*. Cambridge, New York:  
825 Cambridge University Press
